# Supplementary material for: Influence of Blood Pressure Reduction on Pulse Wave Velocity in Primary Hypertension: A Meta-Analysis and Comparison With an Acute Modulation of Transmural Pressure
Source: PubMed Central journal article supplement (PMC11177599; doi:10.1161/hypertensionaha.123.22436), 2024-05-09
Supplement: hyp-81-1619-s002.pdf [file hyp-81-1619-s002.pdf]

**\* Equity Diversity and Inclusion Checklist**

*Does this study focus on research involving differences in sex, gender, race/ethnicity, or other demographic categories or any other topic that should be reviewed through a lens of equity, diversity, and inclusion?*

Yes

**Disparities Research Reporting**

*Does this manuscript focus on reporting health differences by race and/or ethnicity? If so, a completed Disparities Research checklist [ [link](#)] should be provided as a supplemental file.*

No

**Demographic Terminology**

*Does this manuscript adhere to the AMA's guidance for appropriate terminology for demographic information [ [PDE](#)]? If historical terminology is used, is the usage explained?*

Yes

**Sex, Gender, and Race/Ethnicity Specific Results**

*Are sex, gender, and race/ethnicity specific results of the study's primary outcomes reported regardless of whether there are significant differences by sex or race? If not, the reason for not reporting these results should be provided in the manuscript.*

Yes

**Demographic Representation for Clinical Research**

*Were steps taken to ensure the study is demographically representative, and if not, is the focus on one group or exclusion of other groups scientifically and conceptually justified?*

Yes

---

Date completed: 03/01/2024 06:32:09

User pid: 523244
